# Supplementary material for: Monolith catalyst design via 3D printing: a reusable support for modern palladium-catalyzed cross-coupling reactions
Source: Royal Society of Chemistry journal article supplement (doi:10.1039/d0nj03651j), 2020-01-01
Supplement: d0nj03651j1.pdf [file d0nj03651j1.pdf]

## ELECTRONIC SUPPORTING INFORMATION (ESI)

### Monolith catalyst design by 3D printing: A reusable support for modern palladium-catalyzed cross-coupling reactions

Oyekunle Azeez Alimi, Christianah Aarinola Akinnawo and Reinout Meijboom\*

Research Centre for Synthesis and Catalysis, Department of Chemistry, University of Johannesburg, P.O. Box 524, Auckland Park, Johannesburg 2006, South Africa.

\*Author for all correspondence

Correspondence e-mail: rmeijboom@uj.ac.za

Ph.: +27 11 559 2367; Fax: +27 11 559 2819

#### Mechanical characterization

Compression test on the 3D printed monoliths (Pd-MOT) were performed using mechanical testing equipment (ZwickiLine Z5.0 TS, Zwick-Roell) at a displacement rate of  $0.5\text{mmmin}^{-1}$  until crushing. The monolith sample was smoothed at top/bottom surfaces prior analysis to ensure a homogenous distribution of load on the 3D printing mediated structure. Stress-strain data were obtained from the load and displacement data. The compressive strength was calculated from the load at failure and the nominal contact surface area.

#### Hot filtration test experiment

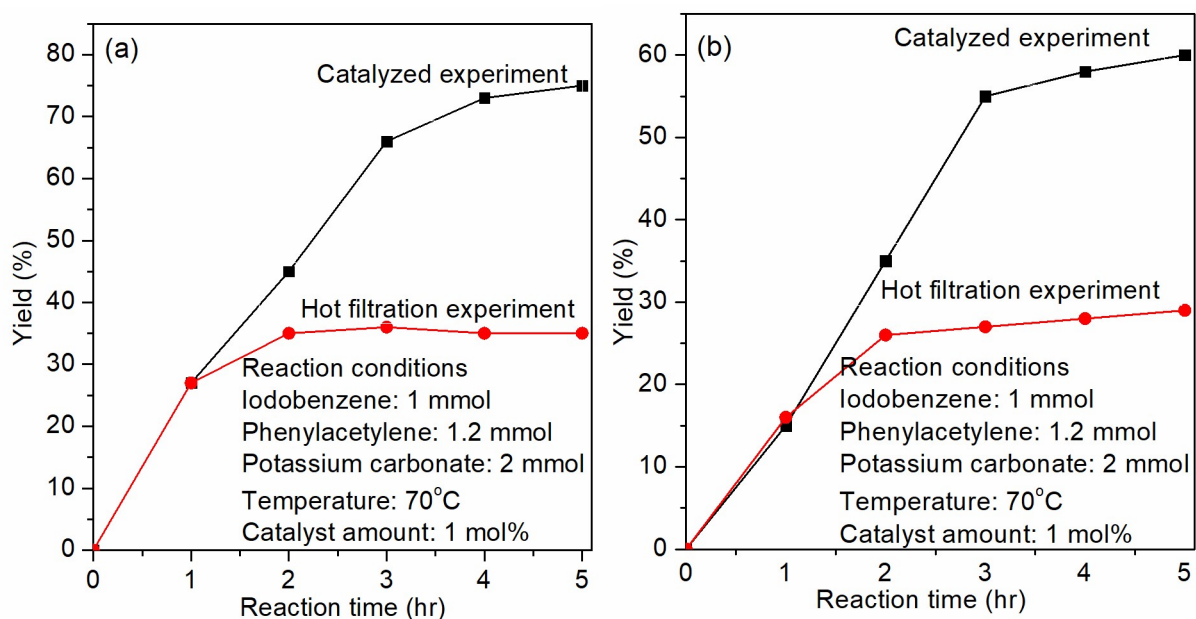

**Figure S1:** Hot filtration test for Sonogashira-Hagihara reaction (a) with Pd-MOT (b) with Pd/Al<sub>2</sub>O<sub>3</sub> catalyst

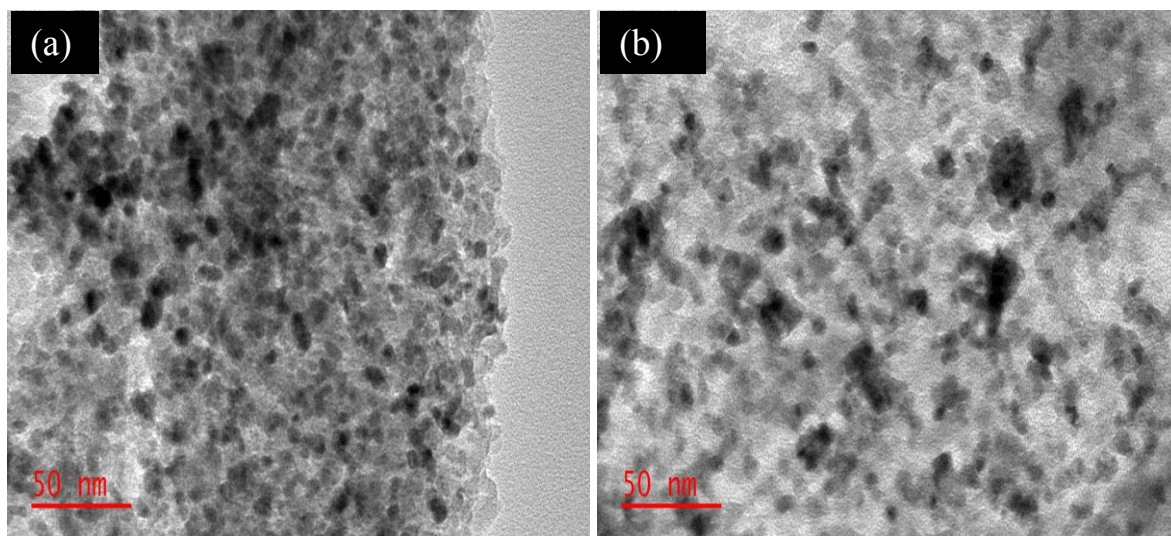

**Figure S2:** (a) TEM image of used Pd-MOT catalyst (b) TEM image of used Pd/Al<sub>2</sub>O<sub>3</sub> catalyst

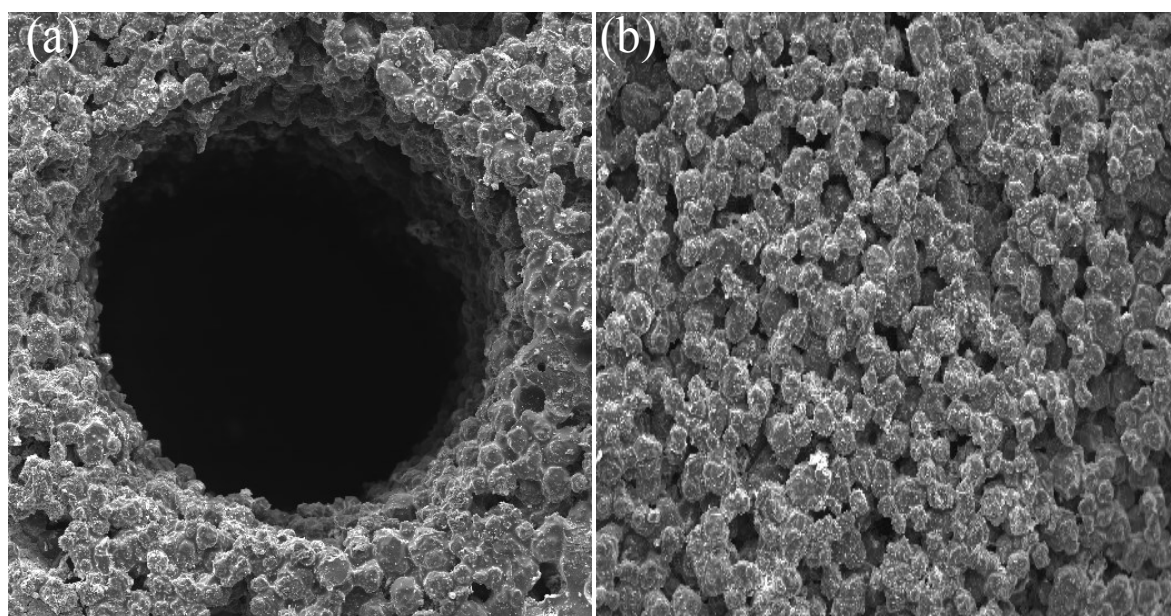

**Figure S3:** (a) SEM image of reused Pd-MOT catalyst (b) SEM image of reused Pd/Al<sub>2</sub>O<sub>3</sub> catalyst

**Table S1:** Comparative experimental results obtained from the coupling reaction of iodobenzene with butyl acrylate catalyzed by Pd-MOT and Pd/Al<sub>2</sub>O<sub>3</sub> <sup>a</sup> at different catalyst amount

| Entry | Catalyst amount<br>(g)/Pd content (mol %) | Pd-MOT                 |                              | Pd/Al <sub>2</sub> O <sub>3</sub> |                              |
|-------|-------------------------------------------|------------------------|------------------------------|-----------------------------------|------------------------------|
|       |                                           | Yield (%) <sup>b</sup> | Selectivity (%) <sup>b</sup> | Yield (%) <sup>b</sup>            | Selectivity (%) <sup>b</sup> |
| 1     | 0.5 (0.3)                                 | 50                     | 100                          | 40                                | 100                          |
| 2     | 1.0 (0.6)                                 | 60                     | 100                          | 50                                | 100                          |
| 3     | 1.5 (1.0)                                 | 85                     | 100                          | 65                                | 100                          |
| 4     | 2.0 (1.3)                                 | 97                     | 100                          | 78                                | 100                          |
| 5     | 2.5 (1.7)                                 | 99                     | 100                          | 80                                | 100                          |
| 6     | 3.0 (2.0)                                 | 99                     | 100                          | 78                                | 100                          |

<sup>a</sup> Reaction conditions: Iodobenzene (1.0 mmol); n-butyl acrylate (1.2 mmol); potassium carbonate (2 mmol); temperature: 80 °C; reaction time: 8 h. <sup>b</sup> Determined from the GC analysis.

**Table S2:** Comparative experimental results obtained from the coupling reaction of iodobenzene with phenylboronic acid catalyzed by Pd-MOT and Pd/Al<sub>2</sub>O<sub>3</sub> at different reaction time.

| Entry | Reaction time<br>(hr) | Pd-MOT                 |                              | Pd/Al <sub>2</sub> O <sub>3</sub> |                              |
|-------|-----------------------|------------------------|------------------------------|-----------------------------------|------------------------------|
|       |                       | Yield (%) <sup>b</sup> | Selectivity (%) <sup>b</sup> | Yield (%) <sup>b</sup>            | Selectivity (%) <sup>b</sup> |
| 1     | 0                     | 0                      | 0                            | 0                                 | 0                            |
| 2     | 1                     | 36                     | 100                          | 36                                | 100                          |
| 3     | 2                     | 50                     | 100                          | 52                                | 100                          |
| 4     | 3                     | 62                     | 100                          | 62                                | 100                          |
| 5     | 4                     | 70                     | 100                          | 64                                | 100                          |
| 6     | 5                     | 75                     | 100                          | 66                                | 100                          |
| 7     | 6                     | 78                     | 100                          | 69                                | 100                          |

<sup>a</sup> Reaction conditions: Iodobenzene (1 mmol); phenylboronic acid (1.2 mmol); potassium carbonate (2 mmol); temperature: 70 °C; <sup>b</sup> Determined from the GC analysis.

**Table S3:** Comparative experimental results obtained from the coupling reaction of iodobenzene with phenylboronic acid catalyzed by Pd-MOT and Pd/Al<sub>2</sub>O<sub>3</sub> <sup>a</sup> at different catalyst amount

| Entry | Catalyst amount<br>(g)/Pd content mol% | Pd-MOT                 |                              | Pd/Al <sub>2</sub> O <sub>3</sub> |                              |
|-------|----------------------------------------|------------------------|------------------------------|-----------------------------------|------------------------------|
|       |                                        | Yield (%) <sup>b</sup> | Selectivity (%) <sup>b</sup> | Yield (%) <sup>b</sup>            | Selectivity (%) <sup>b</sup> |
| 1     | 0.5 (0.3)                              | 50                     | 100                          | 51                                | 100                          |
| 2     | 1.0 (0.6)                              | 73                     | 100                          | 60                                | 100                          |
| 3     | 1.5 (1.0)                              | 85                     | 100                          | 70                                | 100                          |
| 4     | 2.0 (1.3)                              | 90                     | 100                          | 78                                | 100                          |
| 5     | 2.5 (1.7)                              | 93                     | 100                          | 79                                | 100                          |

<sup>a</sup> Reaction conditions: Iodobenzene (1 mmol); phenylboronic acid (1.2mmol); potassium carbonate (2 mmol); temperature: 70 °C; reaction time 6 hr <sup>b</sup> Determined from the GC analysis

**Table S4:** Comparative experimental results obtained from the coupling reaction of iodobenzene with phenylacetylene catalyzed by Pd-MOT and Pd/Al<sub>2</sub>O<sub>3</sub> <sup>a</sup> using different solvent.

| Entry | Catalyst                          | Solvent               | Temperature (°C) | Yield% | Selectivity% |
|-------|-----------------------------------|-----------------------|------------------|--------|--------------|
| 1     | Pd-MOT                            | EtOH                  | 60               | 28     | 100          |
| 2     | Pd/Al <sub>2</sub> O <sub>3</sub> | EtOH                  | 60               | 29     | 100          |
| 3     | Pd-MOT                            | EtOH/H <sub>2</sub> O | 70               | 75     | 100          |
| 4     | Pd/Al <sub>2</sub> O <sub>3</sub> | EtOH/H <sub>2</sub> O | 70               | 60     | 100          |
| 5     | Pd-MOT                            | DMF                   | 100              | 46     | -            |
| 6     | Pd/Al <sub>2</sub> O <sub>3</sub> | DMF                   | 100              | 46     | -            |

<sup>a</sup> Reaction conditions: iodobenzene (1 mmol); phenylacetylene (1.2mmol); potassium carbonate (2 mmol); temperature: 70 °C; reaction time 5 hr <sup>b</sup> Determined from the GC analysis

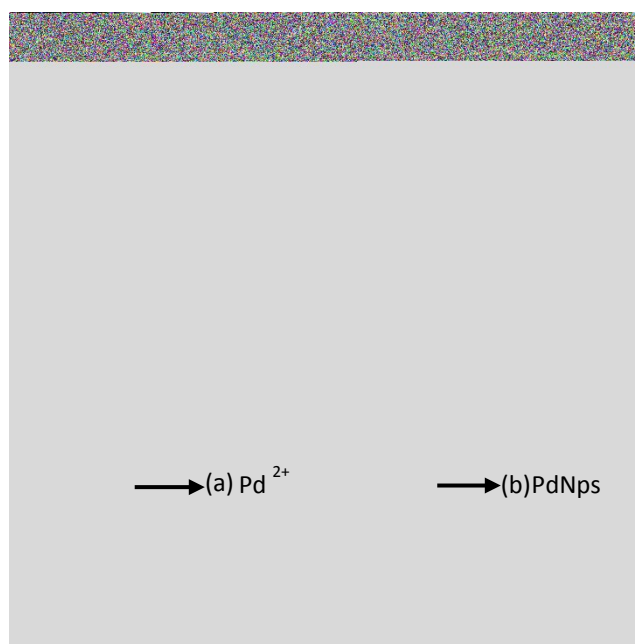

**Figure S4:** (a) Uv-vis spectra of the fresh catalyst (b) Uv-vis spectra of the reused catalyst
